# Supplementary material for: Habitual Meat Consumption and Changes in Sleep Duration and Quality in Older Adults
Source: PubMed Central journal article supplement (PMC6457059; doi:10.14336/ad.2018.0503), 2019-04-01
Supplement: AD-10-2-267-s.pdf [file AD-10-2-267-s.pdf]

## **Habitual Meat Consumption and Changes in Sleep Duration and Quality in Older Adults**

**Alberto Lana<sup>1,2,\*</sup>, Ellen A. Struijk<sup>2</sup>, Lucía Arias-Fernandez<sup>1,2</sup>, Auxiliadora Graciani<sup>2</sup>, Arthur E. Mesas<sup>4</sup>, Fernando Rodriguez-Artalejo<sup>2,3</sup>, Esther Lopez-Garcia<sup>2,3,\*</sup>**

<sup>1</sup>Department of Medicine, Preventive Medicine and Public Health Area, School of Medicine and Health Sciences, Universidad de Oviedo, Spain.

<sup>2</sup>Department of Preventive Medicine and Public Health, School of Medicine, Universidad Autónoma de Madrid, Spain /IdiPAZ, CIBER of Epidemiology and Public Health (CIBERESP), Madrid, Spain.

<sup>3</sup>IMDEA-Food Institute, CEI UAM+CSIC, Madrid, Spain.

<sup>4</sup>Department of Public Health, Universidade Estadual de Londrina, Londrina, PR, Brazil.

# SUPPLEMENTARY DATA

**Supplementary Table 1.** Mean (standard deviation) of baseline consumption of each subtype of meat.

|                             |              |
|-----------------------------|--------------|
| Overall meat, g/d           | 114.0 (53.1) |
| Red and processed meat, g/d | 77.2 (46.4)  |
| Beef, g/d                   | 20.8 (24.3)  |
| Spanish cold cut, g/d       | 19.6 (22.2)  |
| Processed, g/d              | 17.0 (25.5)  |
| Pork, g/d                   | 8.8 (10.6)   |
| Other, g/d                  | 11.0 (15.3)  |
| White meat, g/d             | 36.8 (28.8)  |
| Chicken, g/d                | 29.8 (24.6)  |
| Rabbit, g/d                 | 3.2 (7.5)    |
| Other, g/d                  | 3.8 (10.2)   |

**Supplementary Table 2** Odds ratios (95% confidence interval) for the association between tertiles of meat consumption and change in sleep duration during a 2.8 years follow-up of older adults with some physical impairment<sup>a</sup> (n= 428).

|                                      | Tertile 1<br>(<87 g/d) | Tertile 2        | Tertile 3<br>(≥128 g/d) | p for trend |
|--------------------------------------|------------------------|------------------|-------------------------|-------------|
| No change <sup>b</sup> , n           | 60                     | 39               | 25                      |             |
| Reference category                   | 1.00                   | 1.00             | 1.00                    |             |
| Increase ≥30 min to <2 h, n          | 40                     | 35               | 35                      |             |
| Model 1                              | 1.00                   | 1.46 (0.77-2.76) | 2.50 (1.25-5.02)        | 0.01        |
| Model 2                              | 1.00                   | 1.76 (0.87-3.53) | 3.89 (1.74-8.67)        | 0.001       |
| Model 3                              | 1.00                   | 1.81 (0.86-3.77) | 3.37 (1.40-8.14)        | 0.007       |
| Increase ≥2 h, n                     | 16                     | 12               | 25                      |             |
| Model 1                              | 1.00                   | 1.43 (0.58-3.53) | 4.32 (1.84-10.21)       | 0.001       |
| Model 2                              | 1.00                   | 1.82 (0.66-5.04) | 6.17 (2.17-17.70)       | 0.001       |
| Model 3                              | 1.00                   | 2.22 (0.76-6.44) | 7.07 (2.13-23.45)       | 0.001       |
| Decrease ≥30 min to <2 h, n          | 38                     | 31               | 23                      |             |
| Model 1                              | 1.00                   | 1.10 (0.57-2.15) | 1.90 (0.90-4.00)        | 0.11        |
| Model 2                              | 1.00                   | 1.26 (0.61-2.58) | 2.31 (1.00-5.41)        | 0.05        |
| Model 3                              | 1.00                   | 1.15 (0.55-2.44) | 1.88 (0.84-4.81)        | 0.12        |
| Decrease ≥2 h, n                     | 11                     | 22               | 16                      |             |
| Model 1                              | 1.00                   | 2.11 (0.54-5.32) | 4.52 (1.65-12.42)       | 0.004       |
| Model 2                              | 1.00                   | 2.02 (0.72-5.68) | 3.71 (1.17-11.79)       | 0.03        |
| Model 3                              | 1.00                   | 2.10 (0.68-6.46) | 3.28 (1.01-12.84)       | 0.08        |
| Slight change <sup>c</sup> (<2 h), n | 78                     | 66               | 58                      |             |
| Model 1                              | 1.00                   | 1.27 (0.74-2.21) | 2.21 (1.19-4.09)        | 0.01        |
| Model 2                              | 1.00                   | 1.50 (0.83-2.72) | 3.01 (1.49-6.04)        | 0.002       |
| Model 3                              | 1.00                   | 1.51 (0.82-2.81) | 2.61 (1.22-5.63)        | 0.01        |
| Large change <sup>c</sup> (≥2 h), n  | 27                     | 34               | 41                      |             |
| Model 1                              | 1.00                   | 1.69 (0.84-3.99) | 4.42 (2.12-9.21)        | <0.001      |
| Model 2                              | 1.00                   | 1.77 (0.83-3.76) | 4.64 (2.01-10.71)       | <0.001      |
| Model 3                              | 1.00                   | 2.03 (0.93-4.43) | 5.50 (2.17-12.97)       | <0.001      |

<sup>a</sup> Basal impaired mobility, impaired agility, Katz index ≤5 or Lawton-Brody index ≥1.

<sup>b</sup> Less than 30 minutes of change in sleep duration.

<sup>c</sup> Increase or decrease.

Model 1: multinomial logistic regression adjusted for sex, age (<70, 70-75, ≥75 y), educational level (≤ primary, secondary, university) and sleep duration in 2012 (<7, 7-9, >9 h).

Model 2: multinomial logistic regression additionally adjusted for physical activity (METs-h/wk, tertiles), smoking (never smoker, former smoker, current smoker), alcohol (g/d, tertiles), caffeine (mg/d, tertiles), BMI (<25, 25-29.9, ≥30 kg/m<sup>2</sup>), diet quality index (MEDAS score, tertiles), energy intake (kcal/d, tertiles) and baseline and incident morbidity, including diabetes, cancer, cardiovascular and musculoskeletal diseases.

Model 3: multinomial logistic regression additionally adjusted for sodium (g/d, tertiles), cholesterol (g/d, tertiles) and saturated fatty acids intakes (g/d, tertiles).

# SUPPLEMENTARY DATA

**Supplementary Table 3.** Odds ratios (95% confidence interval) for the association between tertiles of meat consumption and the incidence of each indicator of poor sleep quality during a 2.8 years follow-up of older adults with some physical impairment<sup>a</sup> (n= 428).

|                                              | <b>Tertile 1<br/>(&lt;87 g/d)</b> | <b>Tertile 2</b> | <b>Tertile 3<br/>(≥128 g/d)</b> | <b>p for trend</b> |
|----------------------------------------------|-----------------------------------|------------------|---------------------------------|--------------------|
| Difficulty falling asleep, n cases/N         | 17/78                             | 19/68            | 20/74                           |                    |
| Model 1                                      | 1.00                              | 1.47 (0.68-3.18) | 1.73 (0.79-3.79)                | 0.17               |
| Model 2                                      | 1.00                              | 1.48 (0.60-3.65) | 2.65 (1.01-6.91)                | 0.04               |
| Model 3                                      | 1.00                              | 1.44 (0.59-3.55) | 2.29 (0.90-5.58)                | 0.08               |
| Awakening during the night, n cases/N        | 33/46                             | 23/38            | 27/37                           |                    |
| Model 1                                      | 1.00                              | 0.65 (0.24-1.71) | 1.18 (0.41-3.42)                | 0.83               |
| Model 2                                      | 1.00                              | 0.37 (0.10-1.58) | 0.65 (0.10-4.09)                | 0.40               |
| Model 3                                      | 1.00                              | 0.19 (0.03-1.32) | 0.32 (0.04-3.15)                | 0.17               |
| Early awakening, n cases/N                   | 27/75                             | 17/61            | 26/65                           |                    |
| Model 1                                      | 1.00                              | 0.67 (0.32-1.41) | 1.30 (0.62-2.71)                | 0.55               |
| Model 2                                      | 1.00                              | 0.68 (0.31-1.55) | 1.62 (0.65-4.03)                | 0.44               |
| Model 3                                      | 1.00                              | 0.54 (0.22-1.31) | 1.89 (0.67-5.34)                | 0.45               |
| Need to sleep at daytime, n cases/N          | 15/135                            | 14/117           | 14/96                           |                    |
| Model 1                                      | 1.00                              | 1.06 (0.47-2.36) | 1.28 (0.57-2.89)                | 0.56               |
| Model 2                                      | 1.00                              | 0.94 (0.38-2.28) | 1.44 (0.55-3.71)                | 0.50               |
| Model 3                                      | 1.00                              | 0.90 (0.36-2.24) | 1.42 (0.48-4.22)                | 0.59               |
| Not feeling rested in the morning, n cases/N | 24/119                            | 14/100           | 12/88                           |                    |
| Model 1                                      | 1.00                              | 0.70 (0.33-1.46) | 0.84 (0.38-1.86)                | 0.57               |
| Model 2                                      | 1.00                              | 0.62 (0.27-1.43) | 0.91 (0.35-2.36)                | 0.69               |
| Model 3                                      | 1.00                              | 0.72 (0.30-1.71) | 1.23 (0.41-3.63)                | 0.88               |
| Use of sleeping medications, n cases/N       | 17/114                            | 14/99            | 12/80                           |                    |
| Model 1                                      | 1.00                              | 1.15 (0.52-2.55) | 1.07 (0.47-2.46)                | 0.85               |
| Model 2                                      | 1.00                              | 1.02 (0.42-2.45) | 0.90 (0.33-2.43)                | 0.78               |
| Model 3                                      | 1.00                              | 1.40 (0.54-3.70) | 1.23 (0.38-3.99)                | 0.68               |
| Snoring, n cases/N                           | 17/73                             | 11/46            | 12/40                           |                    |
| Model 1                                      | 1.00                              | 1.11 (0.44-2.78) | 1.34 (0.54-3.29)                | 0.54               |
| Model 2                                      | 1.00                              | 1.24 (0.40-3.84) | 1.16 (0.37-3.61)                | 0.76               |
| Model 3                                      | 1.00                              | 1.60 (0.48-5.31) | 1.19 (0.32-4.41)                | 0.68               |
| Poor general sleep quality, n cases/N        | 16/103                            | 18/86            | 23/78                           |                    |
| Model 1                                      | 1.00                              | 1.34 (0.62-2.88) | 2.45 (1.14-5.30)                | 0.02               |
| Model 2                                      | 1.00                              | 1.39 (0.58-3.30) | 2.70 (1.09-6.72)                | 0.03               |
| Model 3                                      | 1.00                              | 1.53 (0.61-3.80) | 2.06 (0.75-5.69)                | 0.16               |
| Daytime sleepiness <sup>b</sup> , n cases/N  | 25/129                            | 15/107           | 13/100                          |                    |
| Model 1                                      | 1.00                              | 0.68 (0.32-1.42) | 0.69 (0.32-1.50)                | 0.30               |
| Model 2                                      | 1.00                              | 0.49 (0.21-1.14) | 0.43 (0.17-1.11)                | 0.06               |
| Model 3                                      | 1.00                              | 0.46 (0.19-1.11) | 0.35 (0.12-1.00)                | 0.04               |

<sup>a</sup> Basal impaired mobility, impaired agility, Katz index ≤5 or Lawton-Brody index ≥1.

<sup>b</sup> >10 points in the Epworth Sleepiness Scale. Analyses based on 1,240 participants who completed the questionnaire

Model 1: logistic regression model adjusted for age, sex and educational level (≤ primary, secondary, university).

Model 2: logistic regression model additionally adjusted for physical activity (METs-h/wk, tertiles), smoking (never smoker, former smoker, current smoker), alcohol (g/d, tertiles), caffeine (mg/d, tertiles), BMI (<25, 25-29.9, ≥30 kg/m<sup>2</sup>), diet quality index (MEDAS score, tertiles), energy intake (kcal/d, tertiles) and baseline and incident morbidity, including diabetes, cancer, cardiovascular and musculoskeletal diseases.

Model 3: logistic regression additionally adjusted for sodium (g/d, tertiles), cholesterol (g/d, tertiles) and saturated fatty acids intakes (g/d, tertiles).

## SUPPLEMENTARY DATA

**Supplementary Table 4.** Odds ratios (95% confidence interval) for the association between meat consumption and both change in sleep duration and number of indicators of poor sleep quality during a 2.8 years follow-up of older adults with some physical impairment<sup>a</sup> (n= 428).

|                             | <b>Tertile 1<br/>(<math>&lt;87</math> g/d)</b> | <b>Tertile 2</b> | <b>Tertile 3<br/>(<math>\geq 128</math> g/d)</b> | <b>p for trend</b> | <b>Continuous per 100 g/d increment</b> |
|-----------------------------|------------------------------------------------|------------------|--------------------------------------------------|--------------------|-----------------------------------------|
| 0 endpoint <sup>b</sup> , n | 26                                             | 17               | 11                                               |                    |                                         |
| Reference category          | 1.00                                           | 1.00             | 1.00                                             |                    |                                         |
| 1 endpoint, n               | 116                                            | 90               | 75                                               |                    |                                         |
| Model 1                     | 1.00                                           | 1.17 (0.55-2.49) | 1.36 (0.59-3.12)                                 | 0.45               | 1.10 (0.59-2.05)                        |
| Model 2                     | 1.00                                           | 0.98 (0.42-2.23) | 1.44 (0.56-3.71)                                 | 0.56               | 1.08 (0.54-2.16)                        |
| Model 3                     | 1.00                                           | 0.98 (0.41-2.34) | 1.26 (0.43-3.66)                                 | 0.72               | 0.98 (0.45-2.15)                        |
| 2 endpoints, n              | 23                                             | 32               | 38                                               |                    |                                         |
| Model 1                     | 1.00                                           | 1.78 (0.71-4.45) | 4.09 (1.56-10.80)                                | 0.004              | 2.14 (1.06-4.33)                        |
| Model 2                     | 1.00                                           | 1.52 (0.56-4.14) | 3.89 (1.29-11.75)                                | 0.02               | 1.81 (0.85-4.16)                        |
| Model 3                     | 1.00                                           | 1.72 (0.60-4.94) | 4.46 (1.27-15.67)                                | 0.02               | 2.05 (0.85-5.06)                        |

<sup>a</sup> Basal impaired mobility, impaired agility, Katz index  $\leq 5$  or Lawton-Brody index  $\geq 1$ .

<sup>b</sup> Endpoints are: large changes (increase or decrease) in sleep duration ( $\geq 2$  hours) and  $\geq 2$  indicators of poor sleep quality.

Model 1: multinomial logistic regression adjusted for sex, age ( $<70$ ,  $70-75$ ,  $\geq 75$  y), educational level ( $\leq$  primary, secondary, university), sleep duration ( $<7$ ,  $7-9$ ,  $>9$  h) in 2012 and indicators of poor sleep in 2012 ( $\leq 1$ ,  $2-3$ ,  $\geq 4$ ).

Model 2: multinomial logistic regression additionally adjusted for physical activity (METs-h/wk, tertiles), smoking (never smoker, former smoker, current smoker), alcohol (g/d, tertiles), caffeine (mg/d, tertiles), BMI ( $<25$ ,  $25-29.9$ ,  $\geq 30$  kg/m<sup>2</sup>), diet quality index (MEDAS score, tertiles), energy intake (kcal/d, tertiles) and baseline and incident morbidity, including diabetes, cancer, cardiovascular and musculoskeletal diseases.

Model 3: multinomial logistic regression additionally adjusted for sodium (g/d, tertiles), cholesterol (g/d, tertiles) and saturated fatty acids intakes (g/d, tertiles).
